# Supplementary material for: The effect of calcium supplementation in people under 35 years old: A systematic review and meta-analysis of randomized controlled trials
Source: eLife journal article supplement (doi:10.7554/elife.79002), 2022-08-19

Figure 2 - source data 1. Forest plots for the association between calcium supplementation and the accretion of lumbar spine bone mineral density (LSBMD)

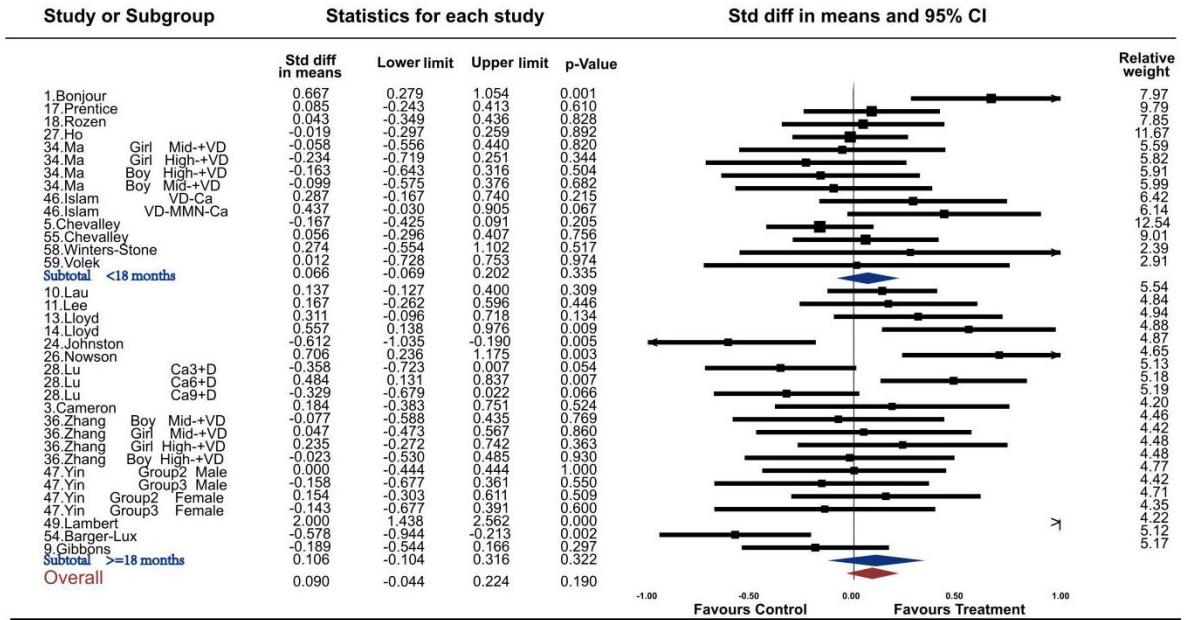

Supplement: fig2-data1 [file elife-79002-fig2-data1-v1.pdf]
